# Supplementary material for: Thrombopoietin from hepatocytes promotes hematopoietic stem cell regeneration after myeloablation
Source: eLife. 2021 Aug 31;10:e69894. doi: 10.7554/eLife.69894 (PMC8457823; doi:10.7554/eLife.69894)
Supplement: Figure 1—figure supplement 1—source data 1. [file elife-69894-fig1-figsupp1-data1.xlsx]

## Sheet: A
	Baseline												5-FU
+/+	9.04	8.9	8.84	7.26	11.6	15.12	15.04	5.18	4.58	12.32	3.04		10.76	23.7	14.12	7.64	2.38	2.52	1.64	4.26	3.7	10.86	3.02
gfp/gfp	5.04	4.08	5.08	6.2	5.06								0.84	0.46	0.98	0.34	0.44

## Sheet: B
+/+	gfp/gfp
1.17281	0.164965
2.58323	0.0903378
1.53904	0.192459
0.832739	0.0667714
0.259413	0.0864101
0.274673
0.178755
0.464328
0.40329
1.18371
0.329172

## Sheet: C
	Baseline											5-FU
+/+	2.85	0.26	4.18	0.05	1.78	2.03	1.15	1.88	2.45	2.26		0.45	0.47	2.91	0.54	1.39	4.75	1.75	0.19	1.8	0.3
gfp/gfp	0.93	1.86	0.15	0.15								0.14	0.04	0.15	0.03	0.07

## Sheet: D
+/+	gfp/gfp
0.238221	0.18123
0.248809	0.0517799
1.5405	0.194175
0.285866	0.038835
0.735839	0.0906149
2.51456
0.926416
0.100582
0.952885
0.158814

## Sheet: E
	Baseline												5-FU
+/+	387	523	953	686	705	791	785	401	385	910	253		730	2264	1419	1889	1401	664	829	362	1944	3464	1759
gfp/gfp	258	115	140	89	101	105							304	174	90	59	17	49

## Sheet: F
+/+	gfp/gfp
1.18454	2.25743
3.6737	1.29208
2.30255	0.668317
3.0652	0.438119
2.27334	0.126238
1.07745	0.363861
1.34518
0.587402
3.15445
5.62089
2.85426

## Sheet: G
	Baseline												5-FU
+/+	0	0	0	0.18	0	0	0	0.12	0.44	0.2	0.8		0	1.18	1.24	0.56	0	0	0	0.51	1.62	2.22	2.76
gfp/gfp	0.24	5.89	0.78	4.2	0.23								0	0.57	0.28	1.06	0.16

## Sheet: H
+/+	gfp/gfp
0	0
7.45977	0.251323
7.83908	0.123457
3.54023	0.467372
0	0.0705467
0
0
3.22414
10.2414
14.0345
17.4483

## Sheet: I
	Baseline												5-FU
+/+	840000000	832000000	6.34667e+08	1029333333	1120000000	900000000	792000000	695000000	930000000	1020000000	1250000000		3.41333e+08	2.77333e+08	8.53333e+07	584000000	104000000	320000000	1.22667e+08	190000000	235000000	515000000	205000000
gfp/gfp	694000000	572000000	460000000	696000000	965333333	980000000	600000000	715000000	760000000				192000000	215000000	345000000	330000000	210000000	230000000

## Sheet: J
+/+	gfp/gfp
0.373859	0.268226
0.30376	0.300357
0.0934648	0.481968
0.63965	0.461013
0.11391	0.293372
0.350493	0.321312
0.134356
0.208105
0.257393
0.564074
0.224534

[truncated: 12 more sheets: K, L, M, N, O, P, Q, R, S, T, U, V]
