# Supplementary material for: Thrombopoietin from hepatocytes promotes hematopoietic stem cell regeneration after myeloablation
Source: eLife. 2021 Aug 31;10:e69894. doi: 10.7554/eLife.69894 (PMC8457823; doi:10.7554/eLife.69894)
Supplement: Figure 1—figure supplement 2—source data 1. [file elife-69894-fig1-figsupp2-data1.xlsx]

## Sheet: A
Con	5-FU	Rad
1.80213	0.463128	0.000591932
1.19327	0.0131111	0.748439
0.00459534	0.0691291	0.0169383

## Sheet: B
Con	Col1a1-cre	Lepr-cre	Prrx1-cre
0.256022	0.96399	0.7128	0.1297
0.0660184	0.597324	1.5654	0.1145
0.2016	0.5791	0.3821	0.4001
2.99341	0.771		0.1157
1.31562	1.68096		0.1741
0.0884	1.63519
0.3227	2.80939
0.7928
1.5721
0.2959

## Sheet: C
Con	Col1a1-cre	Lepr-cre	Prrx1-cre
0.0556342	0.2258	0.1294	0.0113
0.0456	0.1938	0.0511	0.0114
0.2584	0.2041	0.039	0.2849
0.0201705	0.2548		0.2475
0.0809	0.0058		0.298
0.0160894	0.0557
0.1121
0.0536
0.004
0.1138

## Sheet: D
+/gfp	Δ/gfp
11.22	7.88
2.58	5.28
9.12	12.74

## Sheet: E
+/gfp	Δ/gfp
3.44	1.9
0.49	0.86
1.56	2.81

## Sheet: F
+/gfp	Δ/gfp
524	557
247	505
321	471

## Sheet: G
+/gfp	Δ/gfp
0	0
0.04	0
0	0

## Sheet: H
+/gfp	Δ/gfp
456000000	448000000
472000000	432000000
528000000	576000000

## Sheet: I
+/gfp	Δ/gfp
0.0802667	0.083
0.0732	0.0556
0.0682652	0.0484125

## Sheet: J
+/gfp	Δ/gfp
0.00570981	0.0049
0.0038	0.005
0.0040334	0.00373179

[truncated: 4 more sheets: K, L, M, N]
