# Supplementary material for: Thrombopoietin from hepatocytes promotes hematopoietic stem cell regeneration after myeloablation
Source: eLife. 2021 Aug 31;10:e69894. doi: 10.7554/eLife.69894 (PMC8457823; doi:10.7554/eLife.69894)
Supplement: Figure 1—source data 1. [file elife-69894-fig1-data1.xlsx]

## Sheet: E
Con	Col1a1-cre	Lepr-cre	Prrx1-cre
4.86	3.06	4.52	3.8
3.22	4.48	4.04	2.86
25.16	12.52	4.9	6.88
20.68	17.4		10.72
2.5	1.2		6.52
3.1	5.32
8.56
10.64
7.72
4.46

## Sheet: F
Con	Col1a1-cre	Lepr-cre	Prrx1-cre
0.83	0.16	1.34	0.6
0.14	0.07	0.64	0.45
2.55	0.87	1.03	1.15
2.31	1.63		2.3
0.3	0.08		1.3
0.77	0.91
2.61
2.53
1.28
0.67

## Sheet: G
Con	Col1a1-cre	Lepr-cre	Prrx1-cre
3371	3212	1558	313
1766	1081	1635	406
3506	2867	1350	270
2543	2912		1900
813	270		2010
1526	1287
800
1653
1583
642

## Sheet: H
Con	Col1a1-cre	Lepr-cre	Prrx1-cre
0.27	0.3	0.07	0.27
0.76	0.07	0	0.15
0.19	0.03	0.4	0
0.28	0.41		1.63
0.01	0.01		1.24
0.22	0
0
0.18
0.16
0.07

## Sheet: I
Con	Col1a1-cre	Lepr-cre	Prrx1-cre
1008000000	160000000	309333333	496000000
426666667	693333333	224000000	522666667
394666667	288000000	261333333	405333333
192000000	133333333		421333333
344000000	206000000		405333333
234666667	336000000
576000000	117333333
293333333
298666667
256000000
394666667

## Sheet: J
Con	Col1a1-cre	Lepr-cre	Prrx1-cre
0.0545981	0.0717017	0.0139	0.0046
0	0.0847983	0.0252	0.0008
0.0327	0.0977	0.0149	0.0147
0.188301	0.129		0.0152
0.0173712	0.0222145		0.0206
0.0123	0.255436
0.009	0.043006
0.0479
0.0187
0.0278

## Sheet: K
Con	Col1a1-cre	Lepr-cre	Prrx1-cre
180800000	217600000	185600000	184800000
180800000	326400000	120000000	230400000
379200000	185600000	182400000	196800000
124800000	241600000		248000000
158400000	108000000		292800000
147200000	127200000
156800000	184000000
227200000
155200000
89600000
246400000

## Sheet: L
Con	Col1a1-cre	Lepr-cre	Prrx1-cre
0.0172863	0.023	0.0035	0.0002
0.0032	0.0318	0.0032	0
0.0736	0.0532	0.0023	0.0211
0.00379445	0.0702		0.0485
0.0063	0.0008		0.0502
0.00139908	0.0055
0.0087
0.0058
0.000299895
0.0131

## Sheet: M
Con	Col1a1-cre	Lepr-cre	Prrx1-cre
581602	164771	49493.3	23185.6
5785.6	691730	60288	4181.33
408147	380115	43133.9	101109
366274	341603		184323
41215.1	46626		230484
73041.8	150440
46166.4
152063
48140.7
141996
