# Supplementary material for: Thrombopoietin from hepatocytes promotes hematopoietic stem cell regeneration after myeloablation
Source: eLife. 2021 Aug 31;10:e69894. doi: 10.7554/eLife.69894 (PMC8457823; doi:10.7554/eLife.69894)
Supplement: Figure 2—figure supplement 1—source data 1. [file elife-69894-fig2-figsupp1-data1.xlsx]

## Sheet: A
PBS	AAV
0.998197	0.00174277
0.931978	0.0024467
1.05674	0.000346302

## Sheet: B
	Baseline							5-FU
PBS	1.44	1.76	2.64	7.12	7.46	2.76		7.16	5.88	3.04	1.18	9.7	6.12	1.3	7.88	2.34
AAV	1.66	2.72	2.78	3.22				1.4	2.56	7.5	2	5.88	5.9	1.42	5.9	4.76	2.14	2.34

## Sheet: C
PBS	AAV
1.85332	0.539499
1.522	0.986513
0.786885	2.89017
0.305436	0.770713
2.51079	2.2659
1.58412	2.2736
0.336497	0.547206
2.03969	2.2736
0.605695	1.8343
	0.824663
	0.901734

## Sheet: D
	Baseline							5-FU
PBS	0.26	0.14	0.18	0.23	0.76	0.81		0.99	0.89	0.59	0.07	1.98	0.51	0.37	0.19	1.67
AAV	0.45	0.14	0.22	0.18				0.51	0.08	0.38	1.95	0.1	1.8	2.27	0.25	1.01	0.84	0.19

## Sheet: E
PBS	AAV
2.4958	2.06061
2.2437	0.323232
1.48739	1.53535
0.176471	7.87879
4.9916	0.40404
1.28571	7.27273
0.932773	9.17172
0.478992	1.0101
4.21008	4.08081
	3.39394
	0.767677

## Sheet: F
	Baseline							5-FU
PBS	208	228	665	280	893	457		1528	1048	1018	281	3334	3062	738	1240	2769
AAV	163	208	166	174				154	495	183	208	372	583	366	401	506	454	355

## Sheet: G
PBS	AAV
3.35701	0.866385
2.30245	2.78481
2.23654	1.02954
0.617356	1.17018
7.32479	2.09283
6.72721	3.27989
1.62138	2.05907
2.72428	2.25598
6.08349	2.84669
	2.55415
	1.99719

## Sheet: H
	Baseline							5-FU
PBS	0.2	0.39	0.11	0.1	0.23	0.09		0	0.08	1.02	0.38	0.38	0.36	0.3	0.13	0.35
AAV	0.83	0.48	0.52	0.79				0.52	0.27	0	0.4	1.23	0.31	0.17	0	0.42	0	0.71

## Sheet: I
PBS	AAV
0	0.793893
0.428571	0.412214
5.46429	0
2.03571	0.610687
2.03571	1.87786
1.92857	0.473282
1.60714	0.259542
0.696429	0
1.875	0.641221
	0
	1.08397

## Sheet: J
	Baseline							5-FU
PBS	0.124	0.161	0.0781	0.178	0.202	0.1508		0.484876	1.73974	1.3264	0.872	1.2755	0.534533	0.230005	0.22	2.62734
AAV	0.0748	0.0745	0.123	0.0532				1.07	1.29722	4.07683	1.38846	3.01176	0.487158	0.215	0.605269	0.246337	1.0806	0.5226

[truncated: 3 more sheets: K, L, M]
