# Supplementary material for: Thrombopoietin from hepatocytes promotes hematopoietic stem cell regeneration after myeloablation
Source: eLife. 2021 Aug 31;10:e69894. doi: 10.7554/eLife.69894 (PMC8457823; doi:10.7554/eLife.69894)
Supplement: Figure 2—source data 1. [file elife-69894-fig2-data1.xlsx]

## Sheet: A
	Baseline								5-FU
PBS	1120000000	1010000000	1090000000	1310000000	865000000	720000000			205000000	195000000	175000000	125000000	1.01333e+08	1.78667e+08	3.25333e+08	2.45333e+08	1.33333e+08
AAV	1140000000	675000000	870000000	615000000					220000000	96000000	48000000	132000000	92000000	192000000	3.78667e+08	4.66667e+07	1.94667e+08	1.74667e+08	205000000

## Sheet: B
PBS	AAV
0.201145	0.266667
0.191333	0.116364
0.171709	0.0581818
0.122649	0.16
0.0994276	0.111515
0.175307	0.232727
0.319215	0.45899
0.24072	0.0565657
0.130826	0.23596
	0.211717
	0.248485

## Sheet: C
	Baseline								5-FU
PBS	0.00654	0.0074	0.0051	0.0107	0.0085	0.0076			0.0769674	0.256472	0.0959	0.0836	0.189773	0.16869	0.0507609	0.315016	0.0162
AAV	0.0032	0.0023	0.0057	0.0177					0.0073	0.0319054	0.0638043	0.000210972	0.0725163	0.0487553	0.013	0.0356041	0.0316824	0.0833503	0.0321

## Sheet: D
PBS	AAV
10.0743	1.01038
33.5697	4.41597
12.5524	8.83105
10.9424	0.0292003
24.8394	10.0369
22.0798	6.74813
6.6441	1.79931
41.2324	4.9279
2.12042	4.3851
	11.5364
	4.44291

## Sheet: E
	Baseline							5-FU
PBS	202000000	185000000	110000000	151000000	130000000	275300000		149000000	152000000	105500000	74900000	168000000	188800000	174400000	187200000	121600000
AAV	91500000	72500000	73700000	162600000				95600000	198400000	161600000	126400000	142400000	160000000	316800000	113600000	149000000	134000000	167400000

## Sheet: F
PBS	AAV
0.848761	0.955284
0.86585	1.98251
0.600968	1.61479
0.426659	1.26305
0.956992	1.42293
1.07548	1.5988
0.993449	3.16563
1.06636	1.13515
0.69268	1.48888
	1.339
	1.67275

## Sheet: G
	Baseline							5-FU
PBS	0.0002	0.0003	0.0006	0.0003	0.0008	0.0001		0.0547	0.122	0.0001	0.0006	0.00497619	0.0054	0.073913	0.023	0
AAV	0	0.0003	0	0.0003				0.0012	0.0099	0.0027	0.000599782	0.0042	0.0255444	0.001	0.002	0.0368513	0.0196995	0.0002

## Sheet: H
PBS	AAV
142.696	8
318.261	66
0.26087	18
1.56522	3.99855
12.9814	28
14.087	170.296
192.817	6.66667
60	13.3333
0	245.675
	131.33
	1.33333

## Sheet: I
	Baseline							5-FU
PBS	73652	75295	56250	140623	74565	54995.3		239286	685561	167930	104949	200663	311587	294047	815895	21600
AAV	36480	15742.5	49590	109343				17207.2	50270.8	34989.3	1036.61	72695.8	134481	52394.7	18887.2	116583	171982	66139.8

## Sheet: J
PBS	AAV
3.02015	0.325963
8.65279	0.952299
2.11953	0.662816
1.32462	0.0196369
2.53267	1.37711
3.93269	2.54753
3.7113	0.992533
10.2978	0.357789
0.272624	2.20849
	3.25793
	1.25291
