# Supplementary material for: Thrombopoietin from hepatocytes promotes hematopoietic stem cell regeneration after myeloablation
Source: eLife. 2021 Aug 31;10:e69894. doi: 10.7554/eLife.69894 (PMC8457823; doi:10.7554/eLife.69894)
Supplement: Figure 3—figure supplement 1—source data 1. [file elife-69894-fig3-figsupp1-data1.xlsx]

## Sheet: A
	Baseline								Rad
+/+	11.84	3.78	9.08	3.44	4.46				11.14	8.84	6.72	7.22	1.98	2.84
gfp/gfp	3.64	1.72	2.98	2.8	2.4	5.98	6.34		1.06	1.76	1.18	1.08

## Sheet: B
+/+	gfp/gfp
1.70859	0.28693
1.35583	0.476411
1.03067	0.319412
1.10736	0.292343
0.303681
0.435583

## Sheet: C
	Baseline								Rad
+/+	0.43	0.35	1.51	0.51	0.54				4.45	3.15	2.13	2.32	0.54	0.43
gfp/gfp	0.41	0.09	0.2	0.2	0.4	1.21	1.11		0.02	0.28	0.16	0.23

## Sheet: D
+/+	gfp/gfp
6.66168	0.038674
4.71557	0.541436
3.18862	0.309392
3.47305	0.444751
0.808383
0.643713

## Sheet: E
	Baseline								Rad
+/+	1200	631	1017	483	598				1004	964	522	721	621	504
gfp/gfp	210	92	116	143	133	274	269		30	274	152	710

## Sheet: F
+/+	gfp/gfp
1.27768	0.169766
1.22678	1.55053
0.664291	0.860146
0.917536	4.01778
0.790277
0.641385

## Sheet: G
	Baseline								Rad
+/+	0	0	0	0.08	0				2.66	0	0	0	0.05	0.44
gfp/gfp	0.29	0.5	0.22	0.57	0.02	0	0		5.7	14.97	15.87	1.53

## Sheet: H
+/+	gfp/gfp
166.25	24.9375
0	65.4938
0	69.4313
0	6.69375
3.125
27.5

## Sheet: I
	Baseline								Rad
+/+	1040000000	640000000	700000000	550000000	560000000				488000000	6.66667e+08	5.33333e+08	7.14667e+08	7.94667e+08	645000000
gfp/gfp	885000000	600000000	525000000	700000000	530000000	1040000000	1120000000		88000000	1.01333e+08	384000000	416000000

## Sheet: J
+/+	gfp/gfp
0.69914	0.114074
0.95511	0.131358
0.764088	0.497778
1.02388	0.539259
1.13849
0.924069

[truncated: 12 more sheets: K, L, M, N, P, Q, R, S, T, U, V, W]
