# Supplementary material for: Thrombopoietin from hepatocytes promotes hematopoietic stem cell regeneration after myeloablation
Source: eLife. 2021 Aug 31;10:e69894. doi: 10.7554/eLife.69894 (PMC8457823; doi:10.7554/eLife.69894)
Supplement: Figure 3—figure supplement 2—source data 1. [file elife-69894-fig3-figsupp2-data1.xlsx]

## Sheet: A
Con	Col1a1-cre	Lepr-cre	Prrx1-cre
0.0542	0.015531	0.0242729	0.0410902
0.02	0.028557	0.0159	0.0884
0.0758	0.0216	0.0475713	0.0623
0.0484	0.0216	0.0221
0.029723		0.1248
0.025546
0.0333048
0.0732
0.0561
0.0402

## Sheet: B
Con	Col1a1-cre	Lepr-cre	Prrx1-cre
0.0069	0.015585	0.00609702	0.0151991
0.00529685	0.007506	0.0063	0.0075
0.0028	0.012547	0.0066	0.0055
0.0029	0.014617	0.0055
0.0251008		0.0021
0.011467
0.008767
0.0059
0.0028
0.00171
