# Supplementary material for: Thrombopoietin from hepatocytes promotes hematopoietic stem cell regeneration after myeloablation
Source: eLife. 2021 Aug 31;10:e69894. doi: 10.7554/eLife.69894 (PMC8457823; doi:10.7554/eLife.69894)
Supplement: Figure 3—source data 1. [file elife-69894-fig3-data1.xlsx]

## Sheet: E
Con	Col1a1-cre	Lepr-cre	Prrx1-cre
2.64	2.3	2.7	3.12
4.78	3.56	2.8	11.22
4.18	3.16	3.5	3.6
4.72	1.58	4.08
3.32		4.5
2.32
4.14
4.82
2.98
4.62

## Sheet: F
Con	Col1a1-cre	Lepr-cre	Prrx1-cre
1.04	0.76	0.88	0.86
2.18	1.18	0.85	1.46
0.78	1.16	1.01	0.29
1.43	0.56	1.45
1.22		0.73
0.67
1.23
0.47
0.12
0.37

## Sheet: G
Con	Col1a1-cre	Lepr-cre	Prrx1-cre
533	583	516	524
592	337	385	845
720	574	647	346
519	490	539
439		648
383
626
424
347
397

## Sheet: H
Con	Col1a1-cre	Lepr-cre	Prrx1-cre
0	0	0.18	0.5
0	0	0	0
0.46	0.2	0.18	0
1.06	0	0.09
0.03		0
0
0.8
0.14
0
0

## Sheet: I
Con	Col1a1-cre	Lepr-cre	Prrx1-cre
5.54667e+08	656000000	560000000	5.01333e+08
544000000	656000000	5.38667e+08	1100000000
6.34667e+08	856000000	3.78667e+08	905000000
560000000	752000000	720000000
576000000		840000000
688000000
672000000
855000000
705000000
1030000000

## Sheet: J
Con	Col1a1-cre	Lepr-cre	Prrx1-cre
0.0023	0.000851	0.00149833	0.00251806
0.0012	0.000436	0.0008	0.0026
0.0058	0.000204	0.00249849	0.0032
0.002	0.000796	0.0041
0.00045		0.0046
0.000946
0.00102302
0.00447
0.00488
0.00291

## Sheet: K
Con	Col1a1-cre	Lepr-cre	Prrx1-cre
163200000	184800000	146400000	176000000
199200000	180800000	98400000	226000000
204000000	124800000	60800000	160000000
141600000	132000000	177600000
100800000		177600000
187200000
187200000
215000000
167000000
249000000

## Sheet: L
Con	Col1a1-cre	Lepr-cre	Prrx1-cre
0	0.000139	9.99511e-05	0.00021407
0	0.000263	0.0002	0.000101
0.0004	0.000132	0	0.0001
0.000299822	0.000406	0.0003
0		0.0002
0.0001
0.00074768
0.000246
0.0003
0.000301

## Sheet: M
Con	Col1a1-cre	Lepr-cre	Prrx1-cre
13573.3	5839.43	8536.96	13000.7
6952.55	1579.4	4506.13	29300
36810.7	4060.25	9460.95	29100
11387.2	6525.05	30052.8
1399.66		38995.2
2594
6508.48
38500
34900
30500
