# Supplementary material for: Thrombopoietin from hepatocytes promotes hematopoietic stem cell regeneration after myeloablation
Source: eLife. 2021 Aug 31;10:e69894. doi: 10.7554/eLife.69894 (PMC8457823; doi:10.7554/eLife.69894)
Supplement: Figure 4—figure supplement 1—source data 1. [file elife-69894-fig4-figsupp1-data1.xlsx]

## Sheet: A
	Baseline								Rad
PBS	313	513	391	340	786	277	388		407	140	749	633	798
AAV	331	121	198	192	185	159			49	146	362	344	238	274	258

## Sheet: B
PBS	AAV
0.947141	0.247892
0.325798	0.738617
1.74302	1.83137
1.47307	1.7403
1.85705	1.20405
	1.38617
	1.30523

## Sheet: C
	Baseline								Rad
PBS	3.2	3.32	4.42	3.54	6.08	2.02	3.46		1.48	1.52	7.34	4.48	7.82
AAV	4.24	2.04	3.64	1.68	2.7	1.84			1.46	1.88	5.86	2.54	5.8	2.92	4.36

## Sheet: D
PBS	AAV
0.397849	0.542751
0.408602	0.698885
1.97312	2.17844
1.2043	0.944238
2.10215	2.15613
	1.0855
	1.62082

## Sheet: E
	Baseline								Rad
PBS	0.56	1.06	0.98	0.58	0.49	0.29	0.21		0.45	0.33	2.58	1.05	3
AAV	0.65	0.21	0.43	0.05	0.09	0.13			0.17	0.15	2.1	0.82	1.85	1.24	1.47

## Sheet: F
PBS	AAV
0.755396	0.653846
0.553957	0.576923
4.33094	8.07692
1.76259	3.15385
5.03597	7.11538
	4.76923
	5.65385

## Sheet: G
	Baseline								Rad
PBS	0.39	0.21	0.31	0.59	0	0.42	0.1		0.68	0.1	0	0	0
AAV	0.44	1.35	0.64	0.58	0.27	0.34			1.97	0	0	0	0	0.17	0.53

## Sheet: H
PBS	AAV
2.35644	3.26519
0.346535	0
0	0
0	0
0	0
	0.281768
	0.878453

## Sheet: I
	Baseline								Rad
PBS	0.0466	0.2249	0.224171	0.155	0.15	0.0845	0.133		0.0547	0.0786	0.08	0.0427	0.0362	0.0474654	0.0867
AAV	0.0374	0.0339	0.0228	0.0651	0.0791	0.0539			0.0049	0.0202	0.019	0.0149	0.0151135	0.00628331	0.021

## Sheet: J
PBS	AAV
0.375993	0.100618
0.540275	0.414793
0.549898	0.390152
0.293508	0.305961
0.248829	0.310344
0.326264	0.129023
0.595952	0.43122

[truncated: 2 more sheets: K, L]
