# Supplementary material for: Thrombopoietin from hepatocytes promotes hematopoietic stem cell regeneration after myeloablation
Source: eLife. 2021 Aug 31;10:e69894. doi: 10.7554/eLife.69894 (PMC8457823; doi:10.7554/eLife.69894)
Supplement: Figure 4—source data 1. [file elife-69894-fig4-data1.xlsx]

## Sheet: A
	Baseline								Rad
PBS	810000000	605000000	930000000	1000000000	820000000	1420000000	770000000		585000000	608000000	656000000	4.74667e+08	5.97333e+08	4.58667e+08	735000000
AAV	650000000	870000000	655000000	1250000000	925000000	1020000000			485000000	6.45333e+08	704000000	5.38667e+08	5.01333e+08	496000000	740000000

## Sheet: B
PBS	AAV
0.644375	0.541899
0.669709	0.721043
0.722581	0.786592
0.522843	0.601862
0.65796	0.560149
0.505219	0.55419
0.809599	0.826816

## Sheet: C
	Baseline								Rad
PBS	0.0079	0.0144	0.0141981	0.0087	0.0077	0.0039	0.008		0.0054	0.0041	0.0041	0.0069	0.0035	0.00639534	0.0051
AAV	0.0148	0.0123	0.0053	0.0014	0.0019	0.0013			0.0004	0.0006	0.0007	0.0006	0.00211263	0.000161111	0.0004

## Sheet: D
PBS	AAV
0.58335	0.0648649
0.442914	0.0972973
0.442914	0.113514
0.745392	0.0972973
0.378097	0.342589
0.690875	0.0261261
0.550942	0.0648649

## Sheet: E
	Baseline								Rad
PBS	161120690	209023944	193881198	188000000	102000000	84700000	150000000		94860000	193600000	140800000	118400000	139200000	113600000	186000000
AAV	223079545	202563880	217947368	120000000	86500000	68000000			161500000	148800000	164800000	176000000	150400000	184000000	83500000

## Sheet: F
PBS	AAV
0.609906	1.05545
1.24476	0.972453
0.905278	1.07702
0.761257	1.15021
0.894991	0.982909
0.730395	1.2025
1.19589	0.545698

## Sheet: G
	Baseline								Rad
PBS	0.00019837	0	0.00019804	0.0012	0.0007	0.0003	0.0008		0.0003	0.0011	0.0013	0.0006	0.0008	0.0014	0.0004
AAV	9.8787e-05	0.00019998	0.0001	0.0005	0.0005	0.0005			0.0001	0.0002	0.0002	0.0003	0.0004	0.0003	0.000991

## Sheet: H
PBS	AAV
0.6183	0.315995
2.2671	0.631989
2.6793	0.631989
1.2366	0.947984
1.6488	1.26398
2.8854	0.947984
0.8244	3.13151

## Sheet: I
	Baseline								Rad
PBS	64309.6	87120	132427	89256	63854	55634.1	62800		31874.6	27057.6	28726.4	33462.4	22020.3	30923.7	38229
AAV	96420.4	107415	34932.9	18100	18007.5	13600			2101.5	4169.6	5257.6	3760	11192.9	1351.11	3787.49

## Sheet: J
PBS	AAV
0.401732	0.043709
0.341021	0.0867234
0.362054	0.109353
0.421744	0.0782041
0.277533	0.232801
0.389748	0.0281017
0.48182	0.0787758
