# Supplementary material for: Thrombopoietin from hepatocytes promotes hematopoietic stem cell regeneration after myeloablation
Source: eLife journal article supplement (doi:10.7554/elife.69894), 2021-08-31
Supplement: supp [file elife-69894-supp-v1.zip]

# Leukocytes

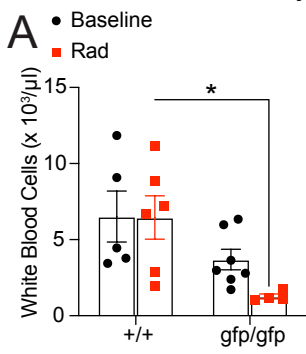

# Neutrophils

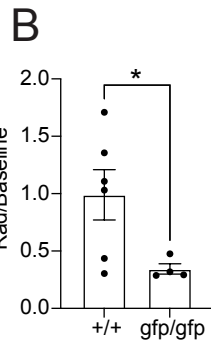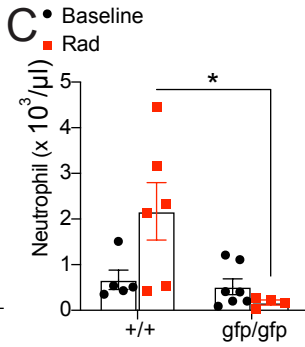

# Platelets

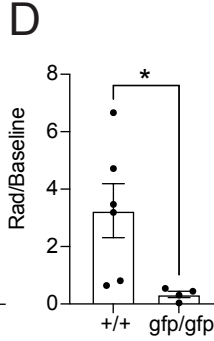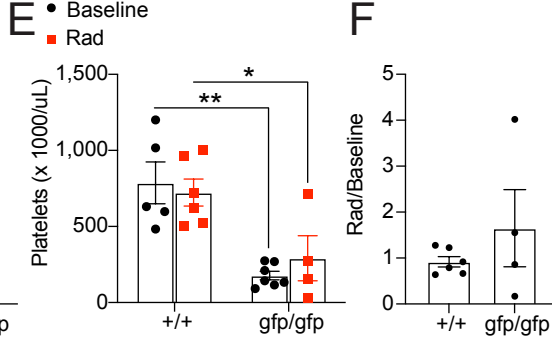

# Reticulocytes

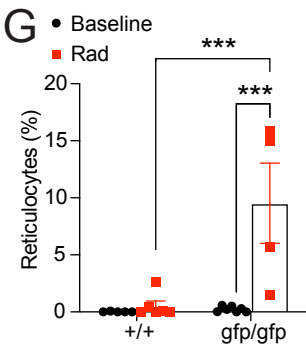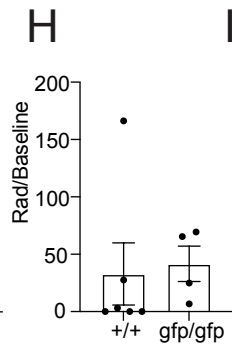

# BM cellularity

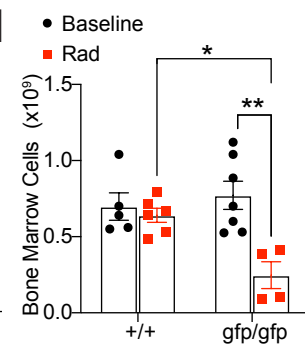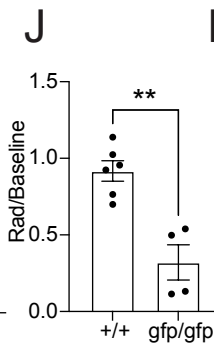

# BM LSKs

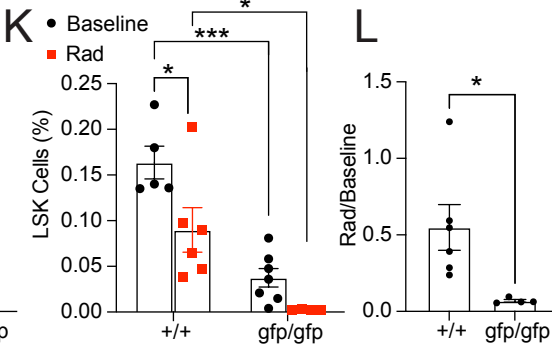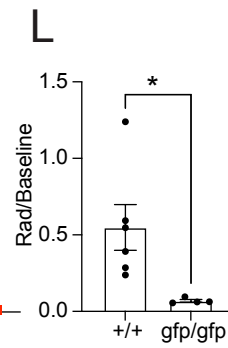

# BM HSCs

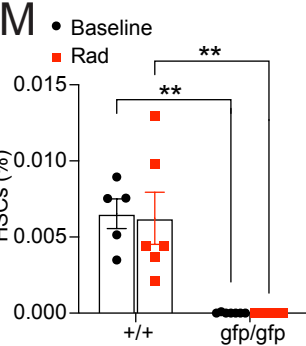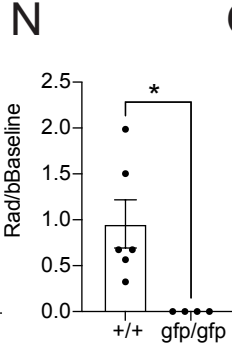

# Survival curve after 5.5Gy radiation

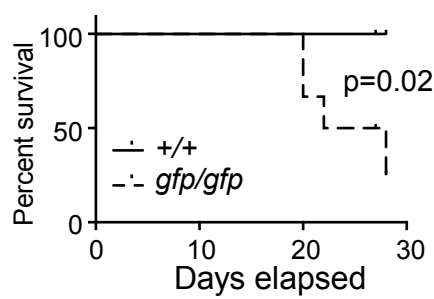

# Spleen cellularity

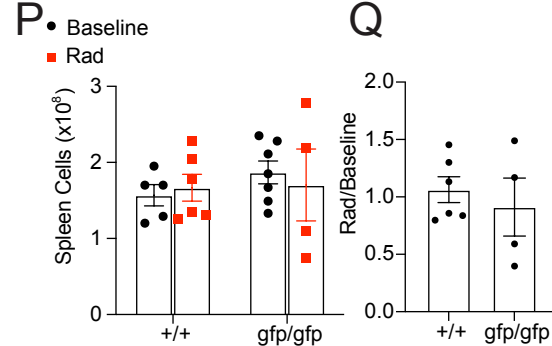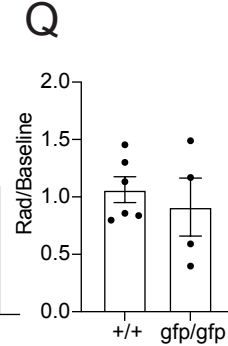

# Spleen LSKs

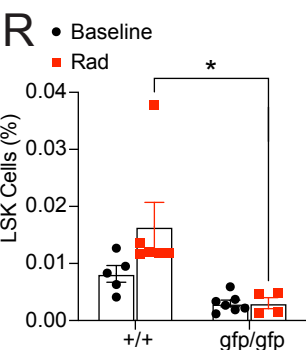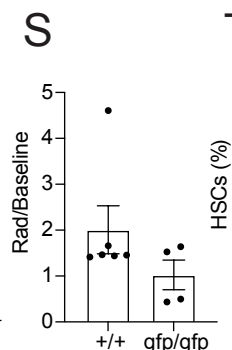

# Spleen HSCs

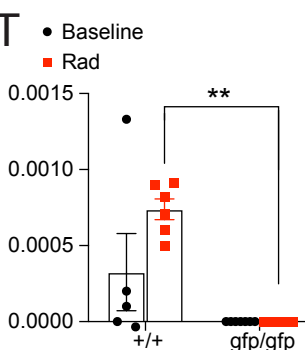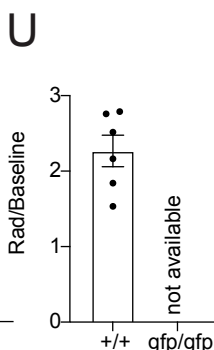

# Total HSC number

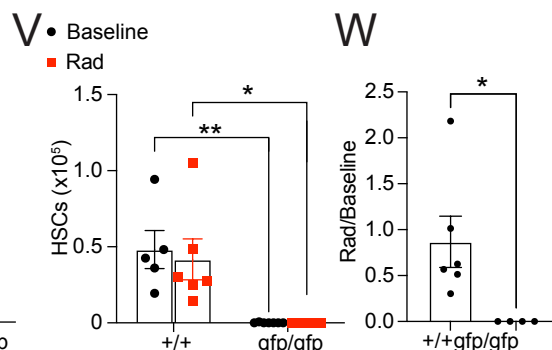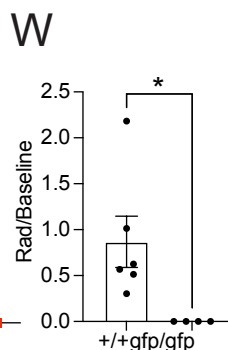

Figure 3-figure supplement 1
