# Supplementary material for: Thrombopoietin from hepatocytes promotes hematopoietic stem cell regeneration after myeloablation
Source: eLife journal article supplement (doi:10.7554/elife.69894), 2021-08-31
Supplement: supp [file elife-69894-supp-v1.zip]

## Platelets

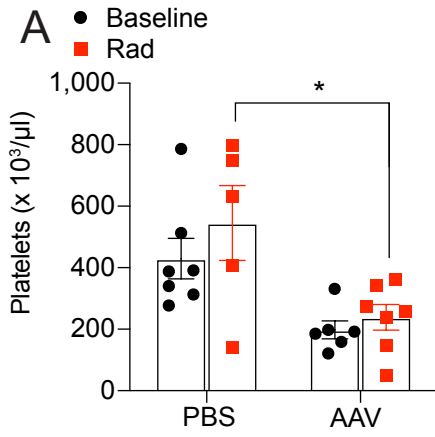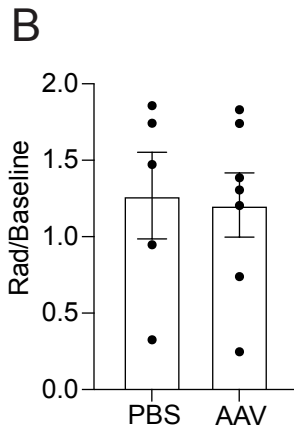

## Leukocytes

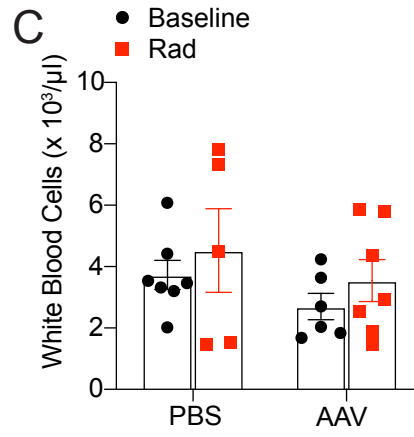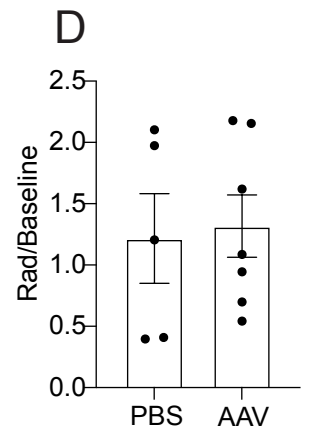

## Neutrophils

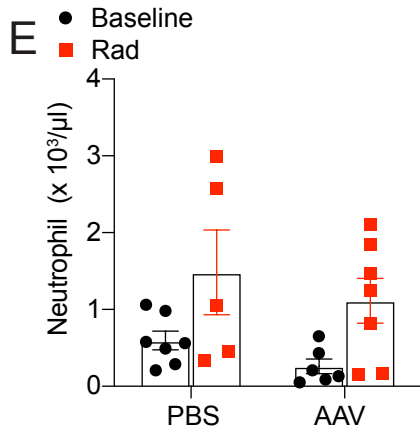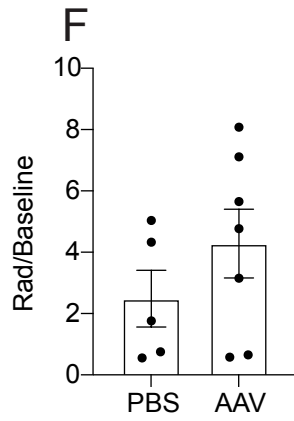

## Reticulocytes

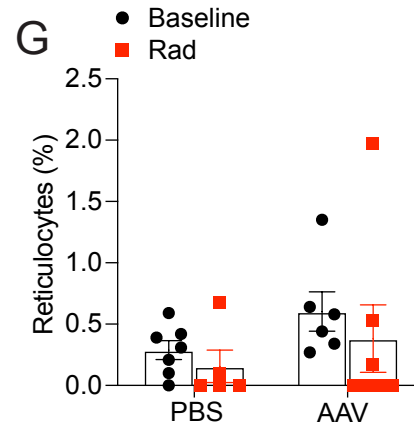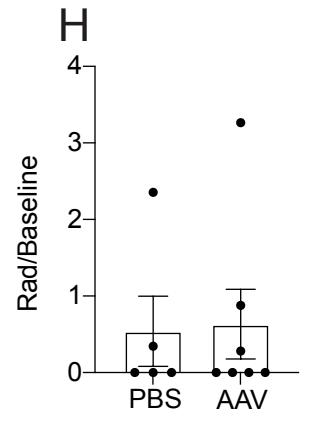

## BM LSKs

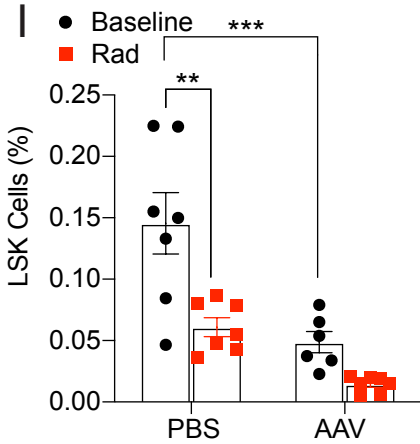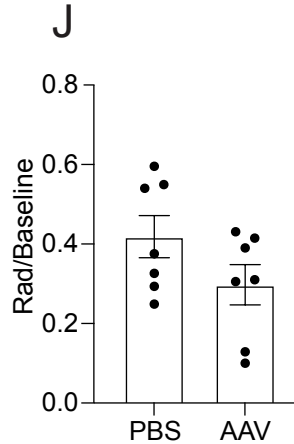

## Spleen LSKs

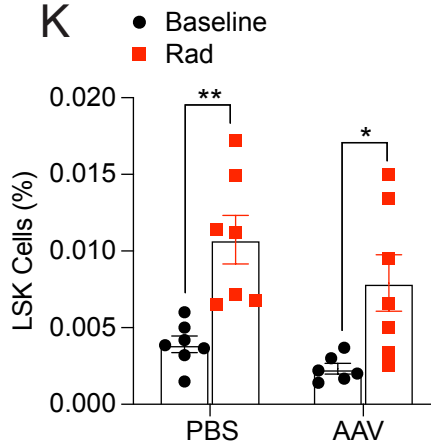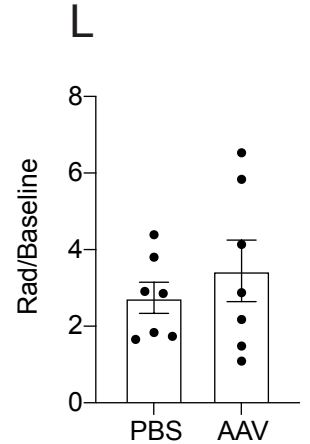

Figure 4-figure supplement 1
