# Supplementary figures and images for: Thrombopoietin from hepatocytes promotes hematopoietic stem cell regeneration after myeloablation
Source: eLife journal article supplement (doi:10.7554/elife.69894), 2021-08-31

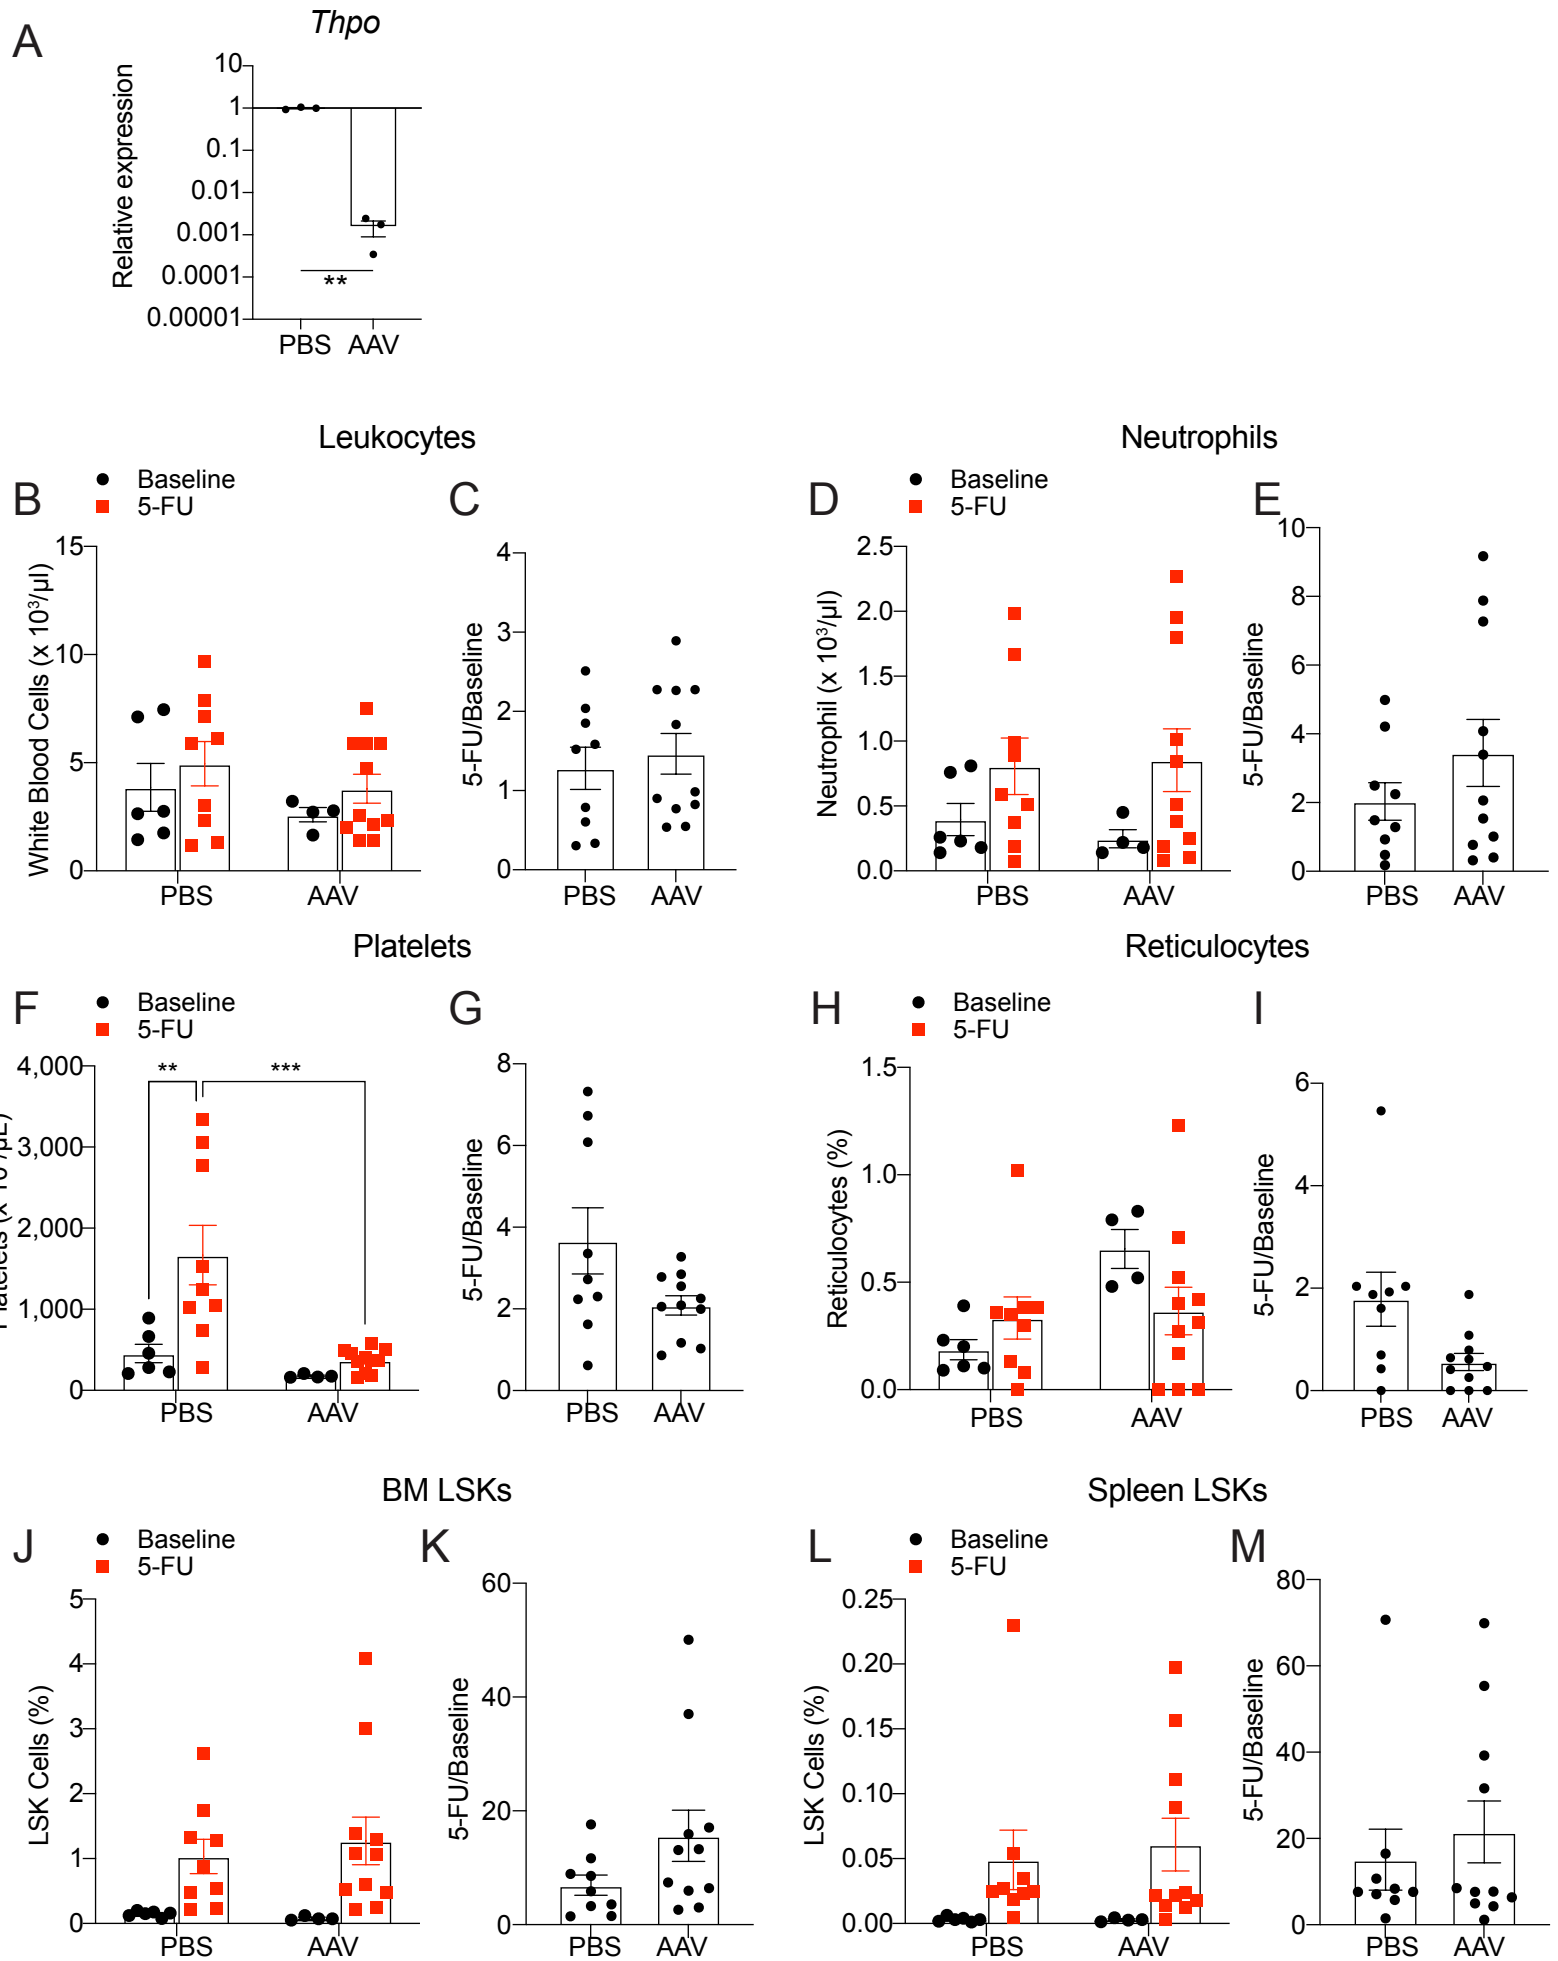

Figure 2-figure supplement 1

Supplement: supp [file elife-69894-supp-v1.zip]

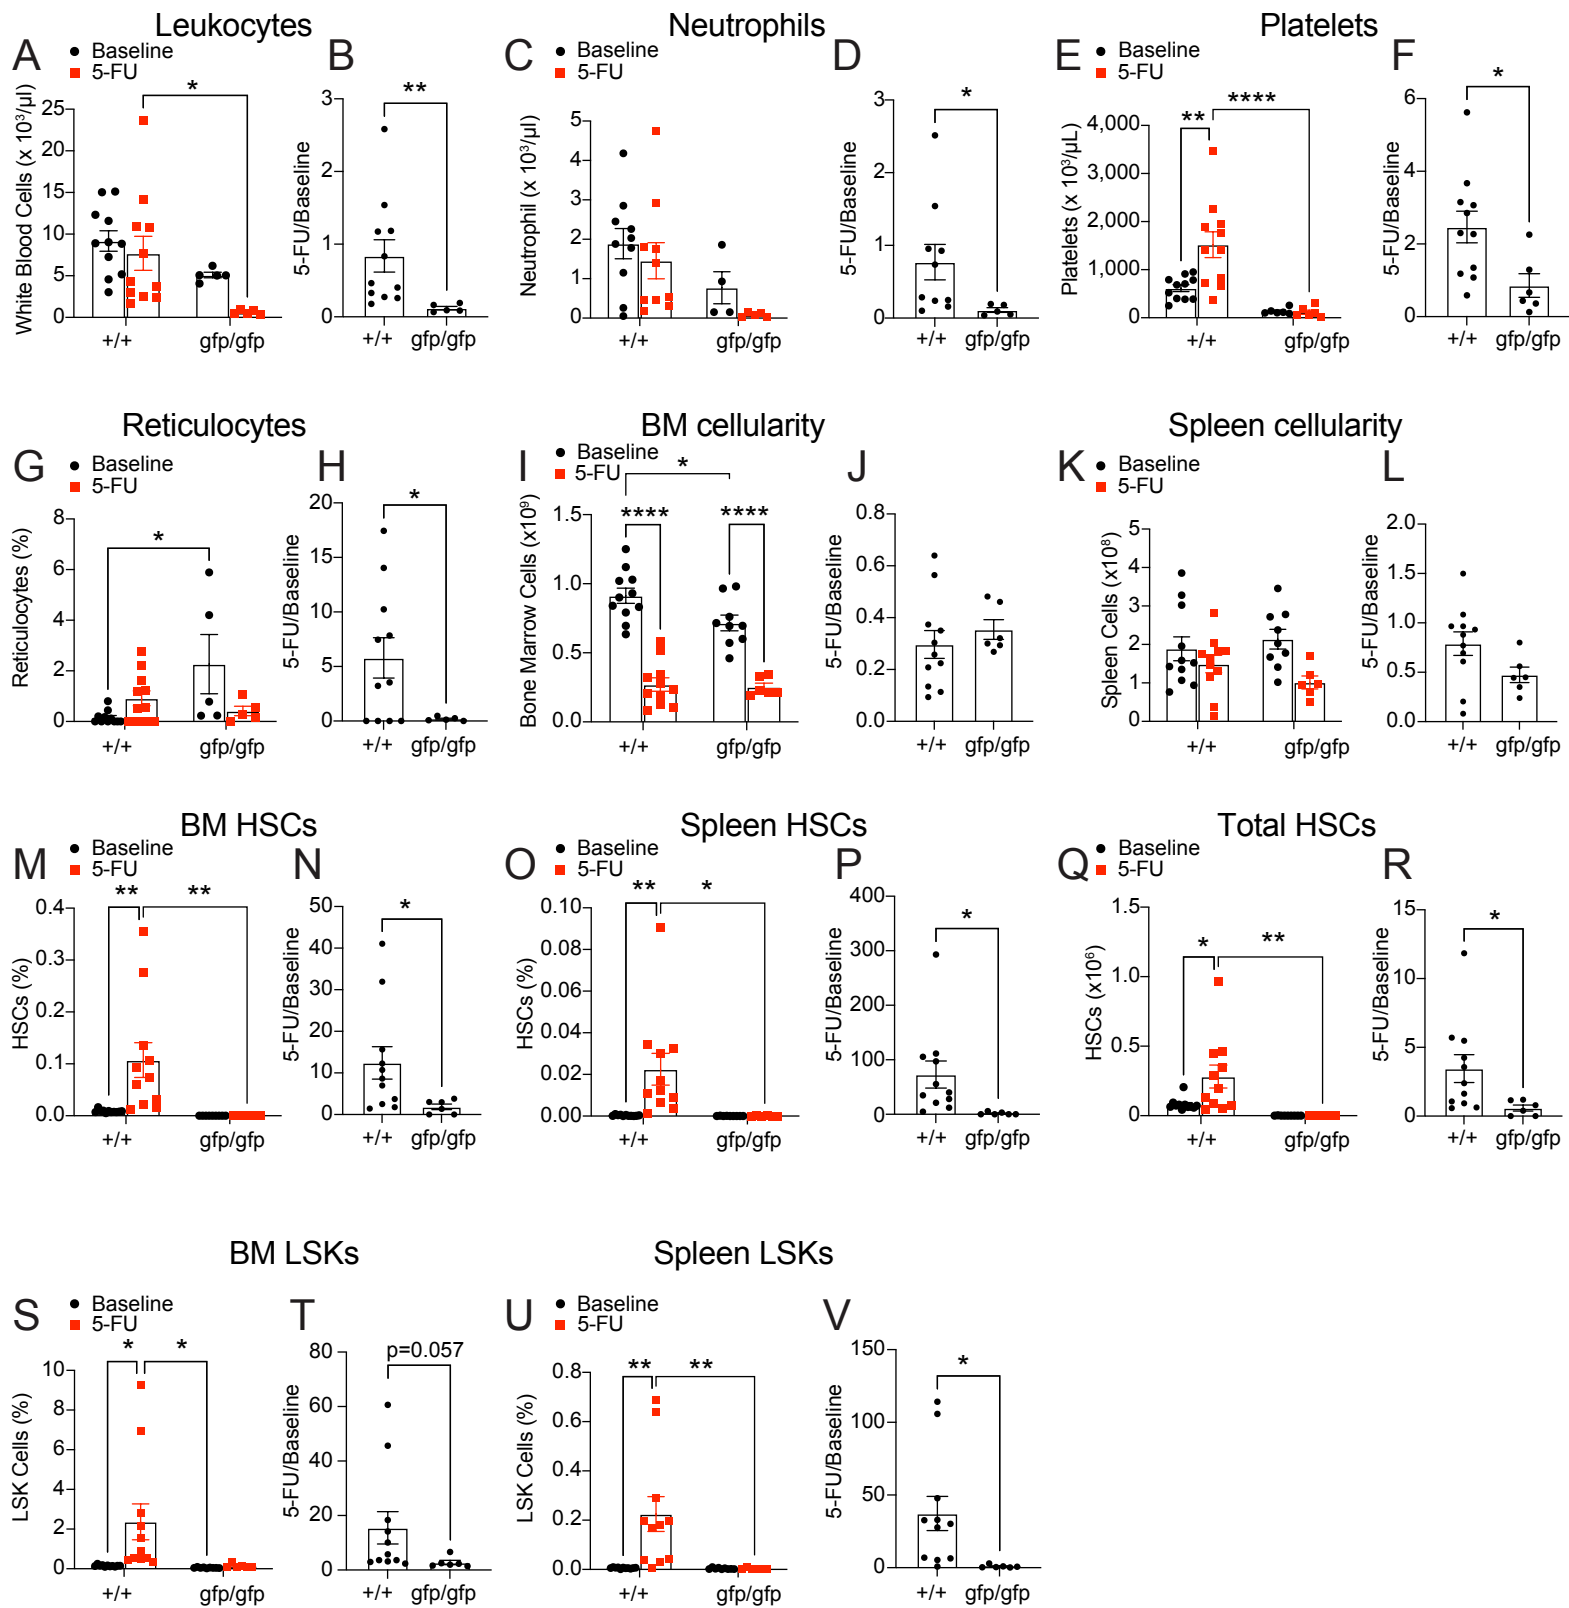

Figure 1-figure supplement 1

Supplement: supp [file elife-69894-supp-v1.zip]

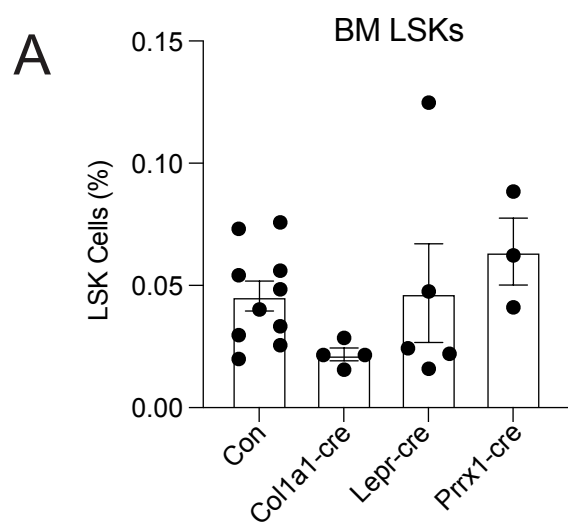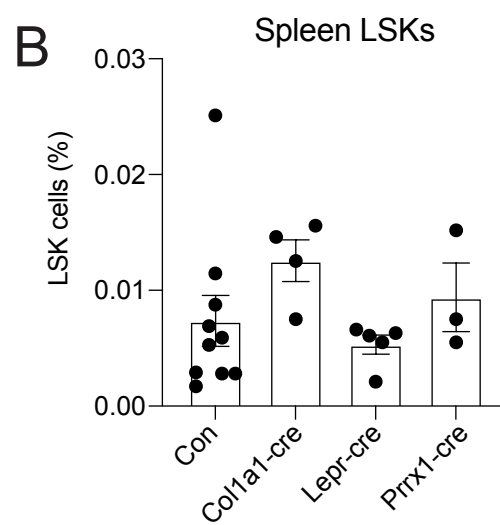

Figure 3-figure supplement 2

Supplement: supp [file elife-69894-supp-v1.zip]

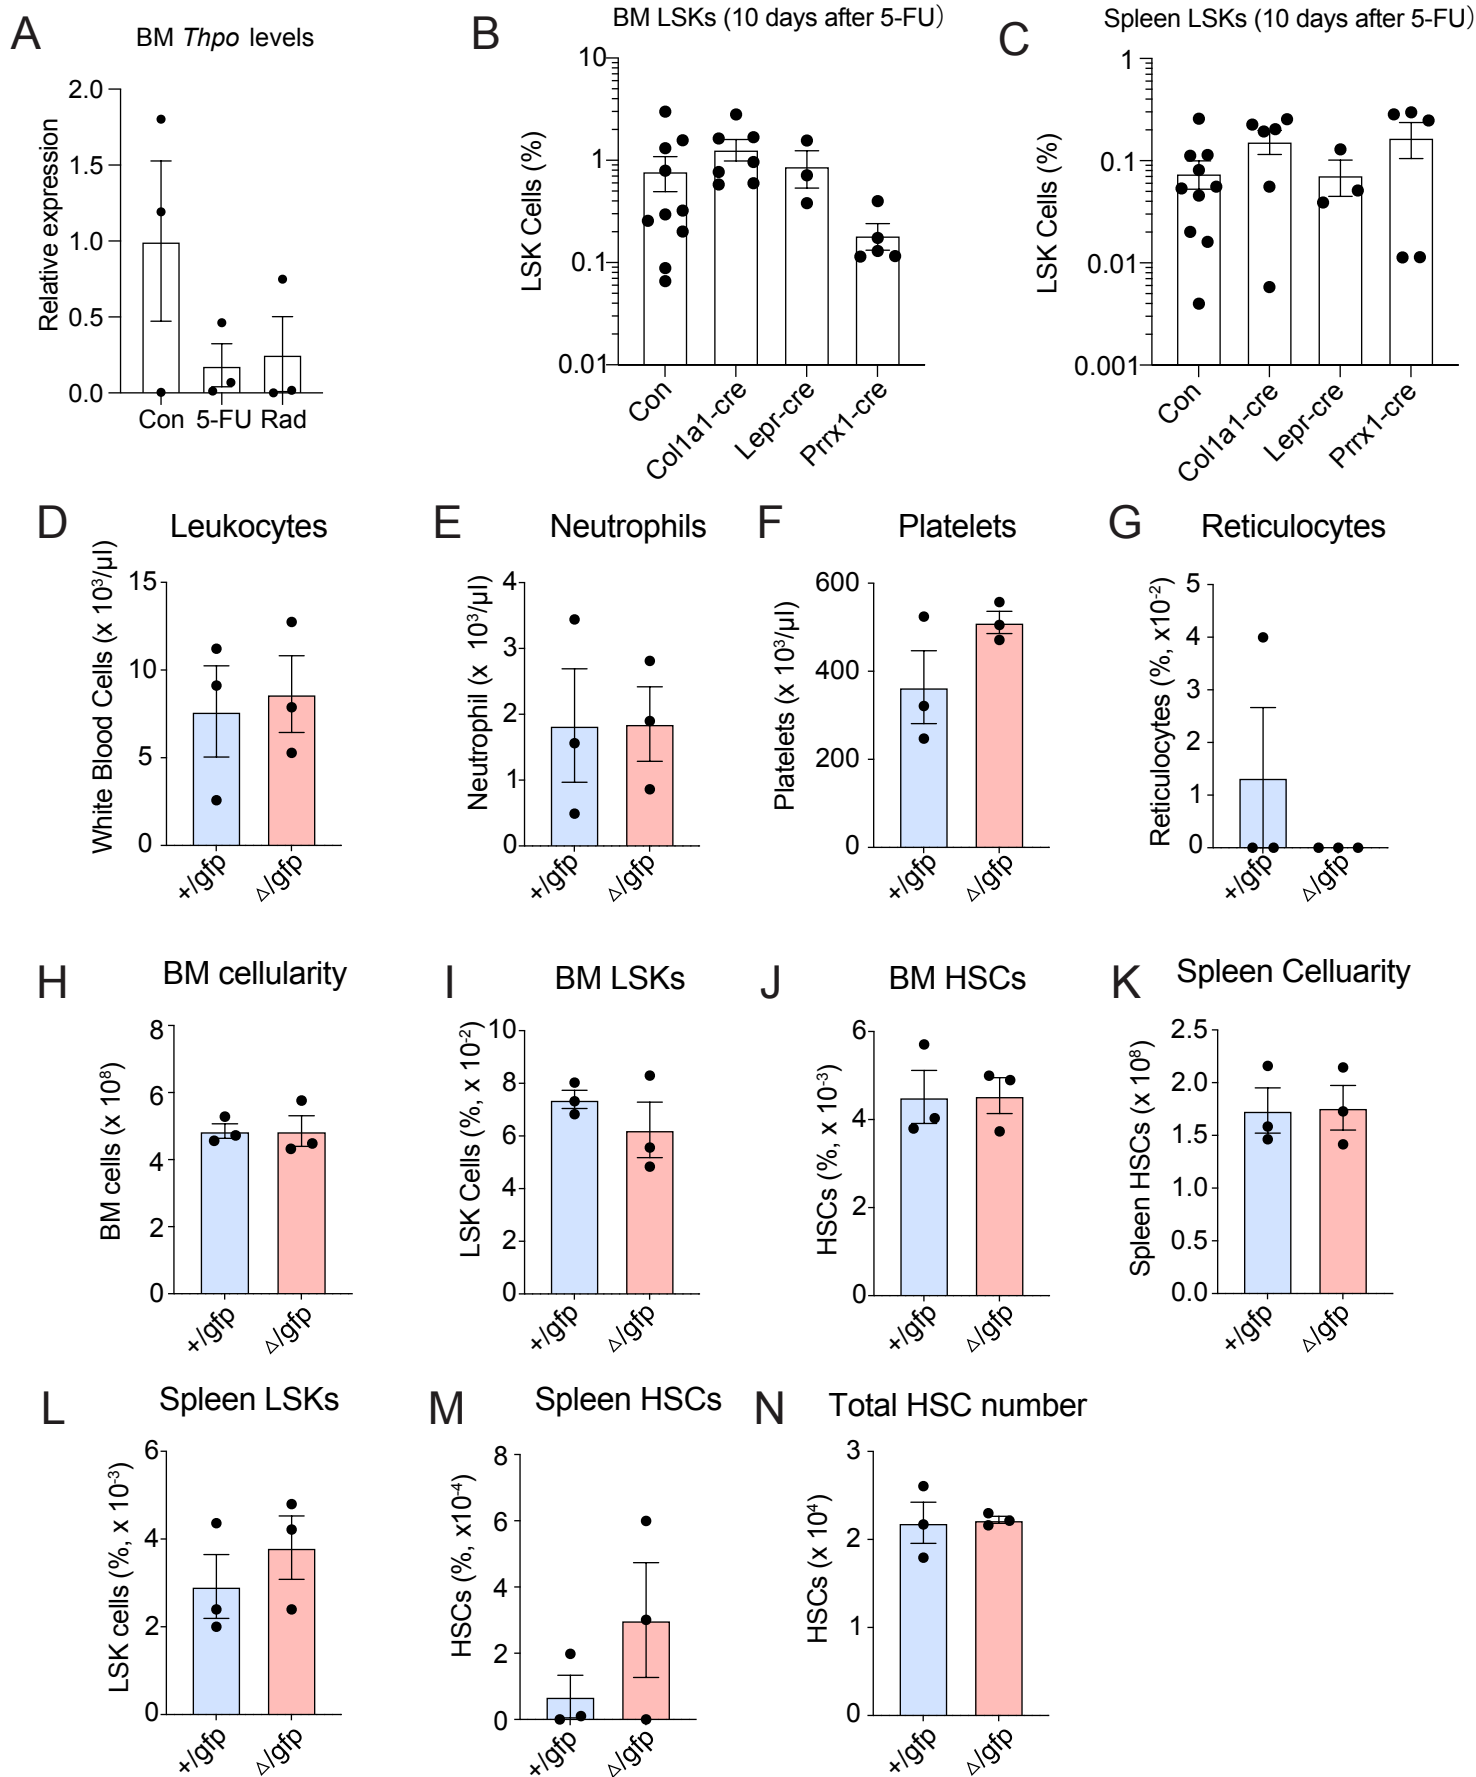

Figure 1-figure supplement 2

Supplement: supp [file elife-69894-supp-v1.zip]
